# Supplementary material for: Is mode of transport to work associated with mortality in the working-age population? Repeated census-cohort studies in New Zealand, 1996, 2001 and 2006
Source: Oxford University Press journal article supplement (doi:10.1093/ije/dyz257), 2019-11-21
Supplement: dyz257_supplementary_data.pdf [file dyz257_supplementary_data.pdf]

**Supplementary Material**

S1: Figure: Causal diagram

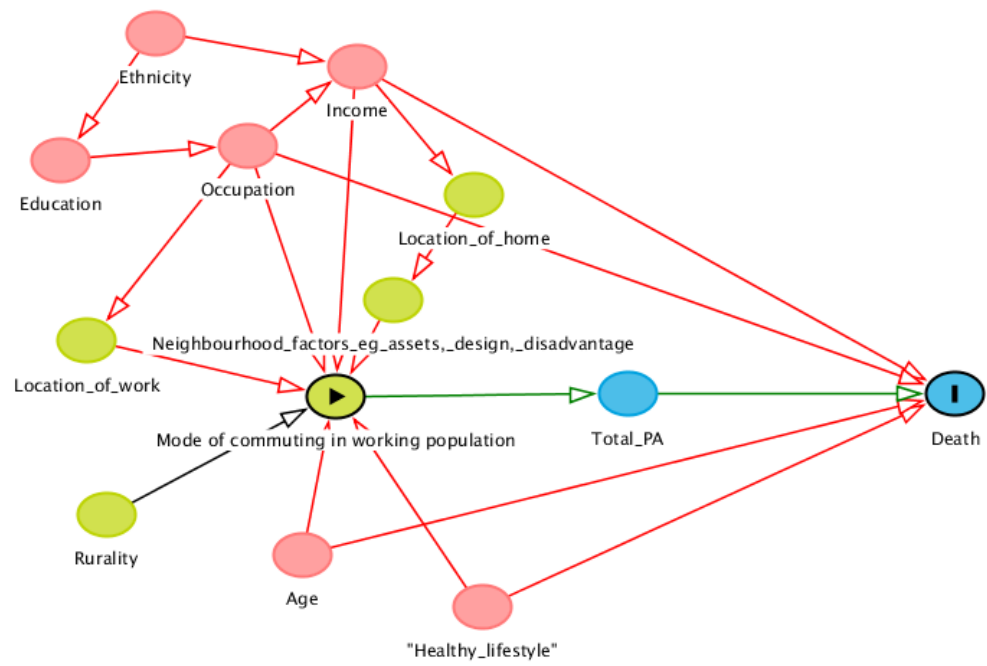

**S2: Quantitative bias analysis exposure misclassification input parameters**

We undertook QBA for cycling compared to private vehicles only.

We initially estimated the sensitivity and specificity of the travel to work census question for classifying regular cyclists accurately (using a definition of a regular cyclists as someone who cycled to work 4 or more days of the week).

|                                               |     |                                                                    |    |  |
|-----------------------------------------------|-----|--------------------------------------------------------------------|----|--|
|                                               |     | Outcome: 'True' regular cyclist (cycle to work 4 or 5 days a week) |    |  |
|                                               |     | Yes                                                                | No |  |
| Test: Census question cycled to work that day | Yes | A                                                                  | B  |  |
|                                               | No  | C                                                                  | D  |  |
|                                               |     |                                                                    |    |  |

To do this we created a table of scenarios about how likely people were to cycle on particular numbers of days of the week (see below). As NZ is a low prevalence cycling country we assume that cyclists were relatively committed individuals and more likely to cycle frequently; however we explored a range of scenarios. Sensitivity (the chance that a person who was a regular cyclist would cycle on census day, and thus tick the box on the census form) for each scenario was calculated by weighting the distribution of cyclists who cycle 4 or 5 days of the week in the scenarios below being seen on those days (i.e. a 100% chance for people who cycle five days a week and an 80% chance for those who cycle four days a week). The sensitivity values were in a reasonably tight range from 0.86 to 0.90.

| Scenarios | Distribution of cycling over days of the week |      |      |      |      | Sensitivity | 1 - PPV |
|-----------|-----------------------------------------------|------|------|------|------|-------------|---------|
|           | 1                                             | 2    | 3    | 4    | 5    |             |         |
| A         | 0.2                                           | 0.2  | 0.2  | 0.2  | 0.2  | 0.90        | 0.40    |
| B         | 0.1                                           | 0.2  | 0.4  | 0.2  | 0.1  | 0.87        | 0.57    |
| C         | 0.1                                           | 0.25 | 0.3  | 0.25 | 0.1  | 0.86        | 0.50    |
| D         | 0.1                                           | 0.15 | 0.25 | 0.3  | 0.2  | 0.88        | 0.34    |
| E         | 0.08                                          | 0.12 | 0.25 | 0.3  | 0.25 | 0.89        | 0.30    |

Specificity (the chance that if someone is not a regular cyclist, i.e. cycles only 3 or fewer days a week, will have not have ticked the census box) was estimated with two steps:

- First, we calculated one minus the positive predictive value (PPV) for the five scenarios above in the table. This estimate was more variable ranging from 0.30 to 0.60. This estimate multiplied by the number of people answering yes to cycling on census night, then divided by the number of people answering yes to use of a motor vehicle, gives an *approximate* estimate of one minus the specificity (assuming no misreporting).<sup>1</sup>
- Second, the above assumes perfect recording of cycle use versus non-cycle use on census day. There will be some errors simply due to ‘ticking the wrong box’. We assumed about 0.2% of people made such random errors – which would be about 1800 of 90000 people recorded as cycling.

---

<sup>1</sup> It is approximate for two reasons: the denominator of people reporting yes to using a car will not be exactly correct for true use of car – but will make little difference at the level of accuracy we require; the non-cycle users include pedestrians and public transport users, but again this will not make too much difference at the level of accuracy required.

The sum of the two components above gives an approximate estimate of one minus the specificity. It was dominated by the second component of random error. However, even if we assumed a 2% random error (driving the specificity to just less than 98%) it made little difference to the misclassification adjusted rate ratio – which was more influenced by the value of the sensitivity.

From the range of sensitivities and specificities above we calculated the mean and standard deviation and then estimated a plausible range of values (slightly larger than the minimum and maximum values). Namely:

- Sensitivity:
  - Assumed inputs of: mode = 0.88; minimum = 0.84; maximum = 0.92.
  - Gives parameters of beta distribution of: alpha = 2090; beta = 285
  - With this beta distribution have: median = 0.880; 2.5<sup>th</sup> percentile = 0.867; 97.5<sup>th</sup> percentile = 0.893.
- Specificity:
  - Assumed inputs of: mode = 0.996; minimum = 0.980; maximum = 0.999.
  - Gives parameters of beta distribution of: alpha = 855; beta = 5.3
  - With this beta distribution have: median = 0.994; 2.5<sup>th</sup> percentile = 0.988; 97.5<sup>th</sup> percentile = 0.998.

**S3: Table: Demographics of people aged 20-64 who were employed and walked or used transport to go to work on census day (i.e. our final cohort)**

| Variable                   | 1996    | 2001    | 2006    |
|----------------------------|---------|---------|---------|
| <i>Gender</i>              |         |         |         |
| Males                      | 549,306 | 506,550 | 623,334 |
| Females                    | 418,119 | 419,907 | 524,982 |
| <i>Age</i>                 |         |         |         |
| 20-24                      | 117,402 | 89,424  | 110,886 |
| 25-34                      | 269,364 | 235,191 | 259,197 |
| 35-44                      | 276,867 | 271,524 | 321,342 |
| 45-54                      | 215,076 | 226,242 | 287,631 |
| 55-64                      | 88,716  | 104,073 | 169,254 |
| <i>Ethnicity</i>           |         |         |         |
| Total NZ Māori             | 96,087  | 87,435  | 116,670 |
| Total Pacific              | 31,887  | 32,097  | 44,925  |
| Total Asian                | 34,425  | 45,252  | 91,806  |
| nonMPA (European/Other)    | 804,000 | 760,776 | 895,914 |
| Missing                    | 5,955   | 4,815   | 5,310   |
| <i>Education</i>           |         |         |         |
| No Qualifications          | 231,009 | 180,354 | 192,090 |
| School Qualifications      | 296,904 | 342,441 | 364,287 |
| Post-School Qualifications | 439,515 | 403,662 | 591,936 |
| <i>Income</i>              |         |         |         |
| Lowest Income              | 112,422 | 132,795 | 261,693 |
| Middle                     | 325,893 | 241,500 | 425,037 |
| Highest Income             | 529,110 | 552,165 | 461,583 |

| Variable               | 1996    | 2001    | 2006      |
|------------------------|---------|---------|-----------|
| <i>NZDep</i>           |         |         |           |
| Dep1-6                 | 661,845 | 636,738 | 775,989   |
| Dep7&8                 | 177,240 | 169,737 | 217,482   |
| Dep9&10                | 128,340 | 119,982 | 154,839   |
| <i>Rurality</i>        |         |         |           |
| Urban (Main & Sec)     | 855,291 | 819,858 | 1,008,525 |
| Rural & Other          | 112,137 | 105,909 | 139,788   |
| <i>Car access</i>      |         |         |           |
| No                     | 35,421  | 25,455  | 25,533    |
| Yes                    | 932,004 | 901,002 | 1,122,780 |
| <i>Smoking Status</i>  |         |         |           |
| Smoker                 | 230,958 | N/A     | 237,042   |
| Ex-Smoker              | 209,721 | N/A     | 251,382   |
| Never Smoked Regularly | 500,316 | N/A     | 623,112   |
| Not Specified          | 26,433  | N/A     | 36,774    |
| <i>Travel to work</i>  |         |         |           |
| Bicycle                | 34,074  | 27,324  | 28,422    |
| Walked or jogged       | 61,080  | 57,363  | 70,149    |
| Public Transport       | 42,441  | 44,061  | 57,177    |
| Motor Vehicle          | 825,015 | 791,091 | 984,096   |
| Other Modes            | 4,815   | 6,618   | 8,469     |
| <i>Weighted deaths</i> |         |         |           |
| Bicycle                | 135     | 99      | 204       |
| Walked or jogged       | 342     | 270     | 606       |
| Public Transport       | 219     | 153     | 360       |
| Motor Vehicle          | 4,494   | 3,456   | 8,985     |

| Variable    | 1996  | 2001  | 2006   |
|-------------|-------|-------|--------|
| Other Modes | 51    | 36    | 78     |
| Total       | 5,241 | 4,014 | 10,233 |

All numbers in this table have been random rounded to base 3 as per Statistics New Zealand confidentiality protocols. This table reports numbers for the cohort with no missing data (i.e. the population regressions were performed on) so is smaller than the numbers reported in the tables in the main article.



**S4: Table: Deaths, person time, standardised mortality rates by mode of travel to work on census day**

| Mode of transport on census day | Deaths | Person time (years) | Standardised mortality rate per 100 000 person years (95% CI) | Standard Rate Ratio (95% CI) |
|---------------------------------|--------|---------------------|---------------------------------------------------------------|------------------------------|
| <i>Male</i>                     |        |                     |                                                               |                              |
| Cycling                         | 441    | 334,771             | 183 (156 - 211)                                               | 0.95 (0.82 – 1.11)           |
| Walking/jogging                 | 768    | 443,410             | 209 (189 – 229)                                               | 1.08 (0.98 – 1.20)           |
| Public transport                | 483    | 319,467             | 212 (185 – 240)                                               | 1.10 (0.97 – 1.26)           |
| Motor vehicle                   | 12741  | 7,329,318           | 192 (188 - 197)                                               | Ref                          |
| <i>Female</i>                   |        |                     |                                                               |                              |
| Cycling                         | 72     | 108,200             | 90 (63-117)                                                   | 0.83 (0.62 – 1.12)           |
| Walking                         | 561    | 525,825             | 121 (108 – 133)                                               | 1.12 (1.00 – 1.25)           |
| Public transport                | 375    | 433,198             | 117 (102 – 132)                                               | 1.08 (0.94 – 1.27)           |
| Motor vehicle                   | 5781   | 5,849,365           | 108 (105 - 112)                                               | Ref                          |
| <i>Sex combined</i>             |        |                     |                                                               |                              |
| Cycling                         | 513    | 442,971             | 161 (139 - 183)                                               | 1.03 (0.90 - 1.19)           |
| Walking                         | 1332   | 969,235             | 161 (150 - 173)                                               | 1.03 (0.96 - 1.11)           |
| Public transport                | 858    | 752,665             | 156 (142 - 170)                                               | 1.00 (0.91 - 1.10)           |
| Motor vehicle                   | 18522  | 13,178,683          | 156 (153 - 159)                                               | Ref                          |

Standardised rates and rate ratios are age and ethnicity standardised. All cohorts combined. Ages 20-64 on census night.

All numbers in this table have been random rounded to base 3 as per Statistics New Zealand confidentiality protocols.

**S5: Table: Regression modelling mode of transport on census day and all-cause mortality, by gender.**

|                                | Transport mode   | Deaths<br>(n)* | Age, ethnicity and cohort<br>adjusted rate ratio (95%CI) | Multivariable† adjusted rate ratio<br>(95%CI) |
|--------------------------------|------------------|----------------|----------------------------------------------------------|-----------------------------------------------|
| <i>All - cause mortality</i>   |                  |                |                                                          |                                               |
| Male                           | Cycling          | 357            | 0.95 (0.83-1.08)                                         | 0.87 (0.76 – 0.99)                            |
|                                | Walking/jogging  | 621            | 1.10 (1.00-1.21)                                         | 0.96 (0.87 – 1.06)                            |
|                                | Public transport | 387            | 1.03 (0.91-1.16)                                         | 0.99 (0.88 – 1.12)                            |
|                                | Motor vehicle    | 10,431         | Ref                                                      | Ref                                           |
| Female                         | Cycling          | 63             | 0.92 (0.70-1.22)                                         | 0.83 (0.63 – 1.10)                            |
|                                | Walking/jogging  | 462            | 1.17 (1.05-1.30)                                         | 0.99 (0.88 -1.11)                             |
|                                | Public transport | 291            | 1.05 (0.91-1.19)                                         | 0.94 (0.82 - 1.08)                            |
|                                | Motor vehicle    | 4,821          | Ref                                                      | Ref                                           |
| <i>Ischaemic heart disease</i> |                  |                |                                                          |                                               |
| Male                           | Cycling          | 69             | 0.99 (0.75-1.32)                                         | 0.90 (0.67-1.20)                              |
|                                | Walking/jogging  | 96             | 0.87 (0.68-1.10)                                         | 0.76 (0.60-0.96)                              |
|                                | Public transport | 75             | 1.02 (0.78-1.34)                                         | 0.99 (0.75-1.31)                              |
|                                | Motor vehicle    | 2,190          | Ref                                                      | Ref                                           |
| Female                         | Cycling          | 6              | 1.35 (0.51-3.56)                                         | 1.04 (0.39-2.78)                              |
|                                | Walking/jogging  | 36             | 1.42 (0.95-2.12)                                         | 1.00 (0.66-1.51)                              |
|                                | Public transport | 30             | 1.83 (1.19-2.81)                                         | 1.49 (0.94-2.34)                              |
|                                | Motor vehicle    | 294            | Ref                                                      | Ref                                           |
| <i>Road traffic crash</i>      |                  |                |                                                          |                                               |
| Male                           | Cycling          | 33             | 0.96 (0.61-1.52)                                         | 1.01 (0.64-1.61)                              |
|                                | Walking/jogging  | 48             | 1.09 (0.74-1.61)                                         | 1.04 (0.70-1.55)                              |
|                                | Public transport | 18             | 0.54 (0.29-1.01)                                         | 0.65 (0.34-1.22)                              |
|                                | Motor vehicle    | 669            | Ref                                                      | Ref                                           |

|        | Transport mode   | Deaths<br>(n)* | Age, ethnicity and cohort<br>adjusted rate ratio (95%CI) | Multivariable† adjusted rate ratio<br>(95%CI) |
|--------|------------------|----------------|----------------------------------------------------------|-----------------------------------------------|
| Female | Cycling          | 6              | 0.99 (0.26-3.78)                                         | 0.98 (0.25-3.76)                              |
|        | Walking/jogging  | 21             | 1.33 (0.76-2.32)                                         | 1.22 (0.69-2.15)                              |
|        | Public transport | 6              | 0.53 (0.21-1.33)                                         | 0.60 (0.24-1.53)                              |
|        | Motor vehicle    | 177            | Ref                                                      | Ref                                           |

†Adjusted for age, ethnicity, cohort, area deprivation, educational qualification, household income, car access, and rurality.

All numbers in this table have been random rounded to base 3 as per Statistics New Zealand confidentiality protocols.

**S6: Table: Regression modelling including smoking variable (1996 and 2006 cohorts only, sex combined)**

|                                | Model 1          | Model 1 plus smoking |
|--------------------------------|------------------|----------------------|
| <i>All-cause mortality</i>     |                  |                      |
| Bicycle                        | 0.82 (0.71-0.94) | 0.88 (0.77-1.01)     |
| Walked or jogged               | 0.95 (0.87-1.03) | 0.97 (0.89-1.06)     |
| Public Transport               | 0.93 (0.84-1.04) | 0.96 (0.86-1.07)     |
| Motor Vehicle                  | Ref              | Ref                  |
| <i>Ischaemic heart disease</i> |                  |                      |
| Bicycle                        | 0.85 (0.62-1.18) | 0.95 (0.69-1.31)     |
| Walked or jogged               | 0.82 (0.65-1.03) | 0.84 (0.67-1.06)     |
| Public Transport               | 0.95 (0.72-1.25) | 0.99 (0.75-1.30)     |
| Motor Vehicle                  | Ref              | Ref                  |
| <i>Road traffic crash</i>      |                  |                      |
| Bicycle                        | 0.88 (0.53-1.48) | 0.92 (0.55-1.55)     |
| Walked or jogged               | 1.03 (0.72-1.49) | 1.05 (0.73-1.51)     |
| Public Transport               | 0.67 (0.38-1.17) | 0.68 (0.39-1.20)     |
| Motor Vehicle                  | Ref              | Ref                  |

Model 1: Adjusted for age, sex, ethnicity, cohort, area deprivation, educational qualification, household income, car access, and rurality. All numbers in this table have been random rounded to base 3 as per Statistics New Zealand confidentiality protocols.

**Table S7: Table: Regression modelling removing first year of deaths as a test of possible reverse causation**

| Transport mode               | Model 1 rate ratio (95% CI) | Model 2 rate ratio (95% CI) |
|------------------------------|-----------------------------|-----------------------------|
| <i>All - cause mortality</i> |                             |                             |
| Cycling                      | 0.87 (0.77-0.98)            | 0.83 (0.73-0.95)            |

| Transport mode                 | Model 1 rate ratio (95% CI) | Model 2 rate ratio (95% CI) |
|--------------------------------|-----------------------------|-----------------------------|
| Walking/jogging                | 0.97 (0.90-1.04)            | 1.00 (0.92-1.09)            |
| Public transport               | 0.96 (0.88-1.05)            | 0.98 (0.89-1.08)            |
| Motor vehicle                  | Ref                         | Ref                         |
| <i>Ischaemic heart disease</i> |                             |                             |
| Cycling                        | 0.90 (0.68-1.19)            | 0.89 (0.65-1.21)            |
| Walking/jogging                | 0.81 (0.66-1.00)            | 0.77 (0.60-0.97)            |
| Public transport               | 1.10 (0.87-1.39)            | 1.11 (0.86-1.43)            |
| Motor vehicle                  | Ref                         | Ref                         |
| <i>Road traffic crash</i>      |                             |                             |
| Cycling                        | 1.01 (0.65-1.57)            | 0.86 (0.50-1.48)            |
| Walking/jogging                | 1.09 (0.79-1.51)            | 1.01 (0.69-1.49)            |
| Public transport               | 0.62 (0.37-1.04)            | 0.69 (0.39-1.19)            |
| Motor vehicle                  | Ref                         | Ref                         |

Model 1: Adjusted for age, sex, ethnicity, cohort, area deprivation, educational qualification, household income, car access, and rurality. Model 2: Model 1 with first 1 year of follow up removed. All numbers in this table have been random rounded to base 3 as per Statistics New Zealand confidentiality protocols.

**Table S8 Impact of exposure misclassification on estimates of the relative risk of all-cause mortality for those cycling to work compared with travelling by private motor vehicle, European/other ethnicity aged 45-64, by gender**

|                     | Baseline RR (95%CI) | RR adjusted for exposure misclassification (median, 2.5 <sup>th</sup> and 97.5 <sup>th</sup> percentiles for total uncertainty †) |
|---------------------|---------------------|-----------------------------------------------------------------------------------------------------------------------------------|
| <b>Men</b>          |                     |                                                                                                                                   |
| All-cause mortality | 0.71 (0.60 - 0.85)  | 0.64 (0.47-0.78)                                                                                                                  |

|                                     | Baseline RR (95%CI) | RR adjusted for exposure misclassification (median, 2.5 <sup>th</sup> and 97.5 <sup>th</sup> percentiles for total uncertainty †) |
|-------------------------------------|---------------------|-----------------------------------------------------------------------------------------------------------------------------------|
| All-cause mortality - never smokers | 0.67 (0.49 - 0.9)   | 0.59 (0.41 - 0.83)                                                                                                                |
| <b>Women</b>                        |                     |                                                                                                                                   |
| All-cause mortality                 | 0.97 (0.7 - 1.35)   | 0.91 (0.51 - 1.27)                                                                                                                |

† Includes both random error (as per the usual confidence interval) plus propagated uncertainty about the sensitivity and specificity bias parameters in the Monte Carlo simulation.
